# Supplementary material for: Designing a Mini-Core Collection Effectively Representing 3004 Diverse Rice Accessions
Source: PubMed Central journal article supplement — Plant Commun. 2020 Apr 24;1(5):100049. doi: 10.1016/j.xplc.2020.100049 (PMC7748012; doi:10.1016/j.xplc.2020.100049), 2020-04-24
Supplement: mmc1.pdf [file mmc1.pdf]

**Plant Communications, Volume 1**

**Supplemental Information**

**Designing a Mini-Core Collection Effectively Representing 3004 Diverse Rice Accessions**

**Angad Kumar, Shivendra Kumar, Kajol B.M. Singh, Manoj Prasad, and Jitendra K. Thakur**

# Supplemental Information

## Designing a Mini-core Collection Effectively Representing 3004 Diverse Rice Accessions

Angad Kumar<sup>#1</sup>, Shivendra Kumar<sup>#1</sup>, Kajol B.M Singh<sup>1</sup>, Manoj Prasad<sup>1</sup>, Jitendra K. Thakur<sup>1\*</sup>

<sup>1</sup> Plant Mediator Lab, National Institute of Plant Genome Research, Aruna Asaf Ali Marg, New Delhi 110067, India

\*Corresponding Author

Email: [jthakur@nipgr.ac.in](mailto:jthakur@nipgr.ac.in)

Phone: +91-11-26735221

<sup>#</sup>Equal contribution

### **This PDF file includes:**

Supplemental Figures 1-2

Supplemental Tables 1-15

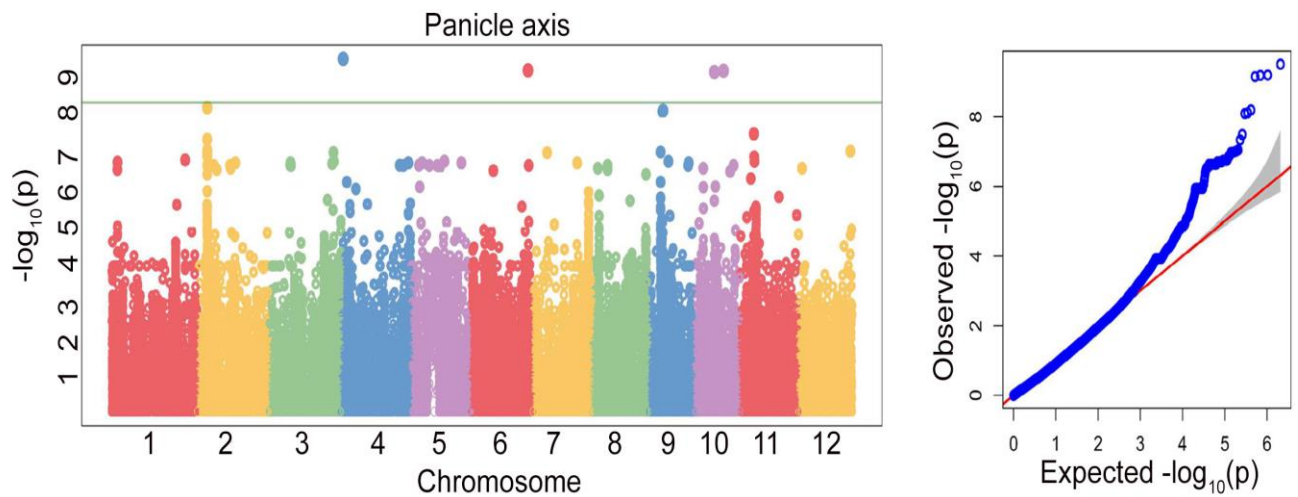

**Supplemental Figure 1: Genome-wide mapping of SNPs associated with panicle axis trait among accessions within mini-core CC3.** Manhattan (left) and QQ (right) plots of compressed MLM GWAS. Negative  $\log_{10}$ -transformed  $P$  values (y axis) values from the compressed mixed linear model are plotted against position of SNPs (x axis) on different chromosomes. Green line in figure represents the genome-wide cut-off for significant association. Red and blue line in QQ plot represent trajectory for null hypothesis and observed values, respectively.

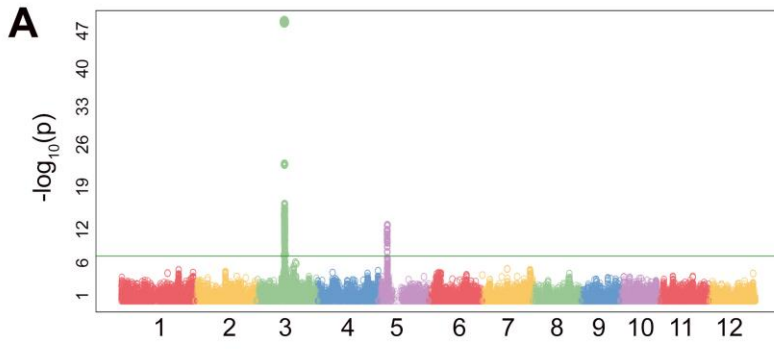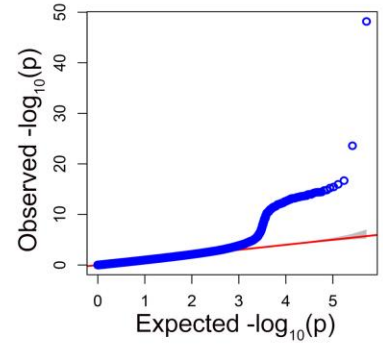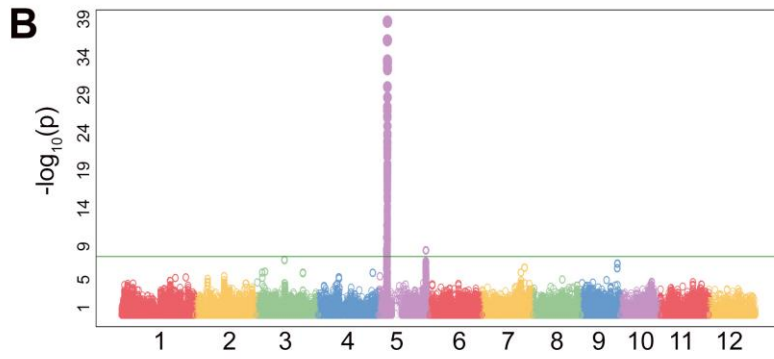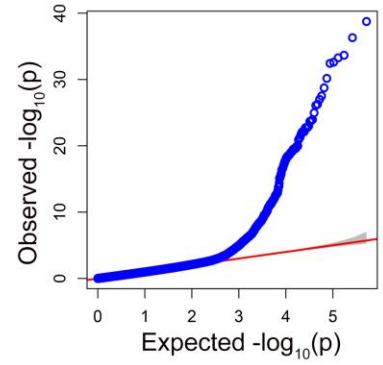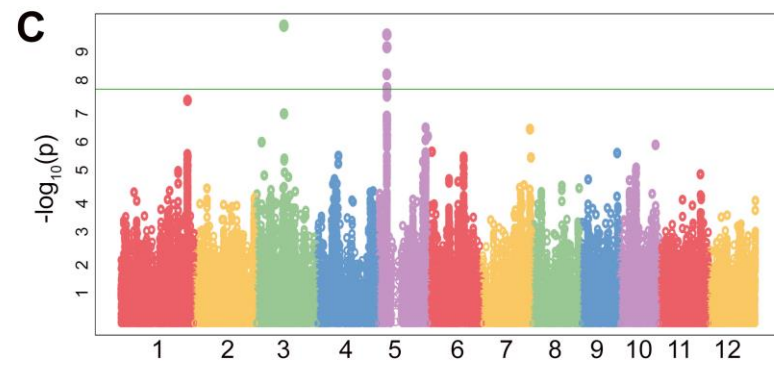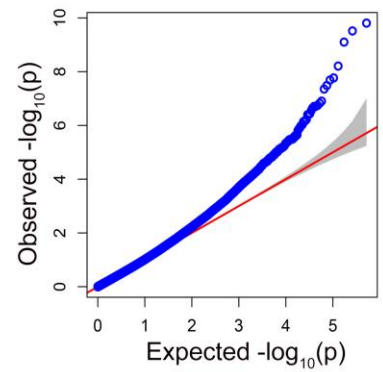

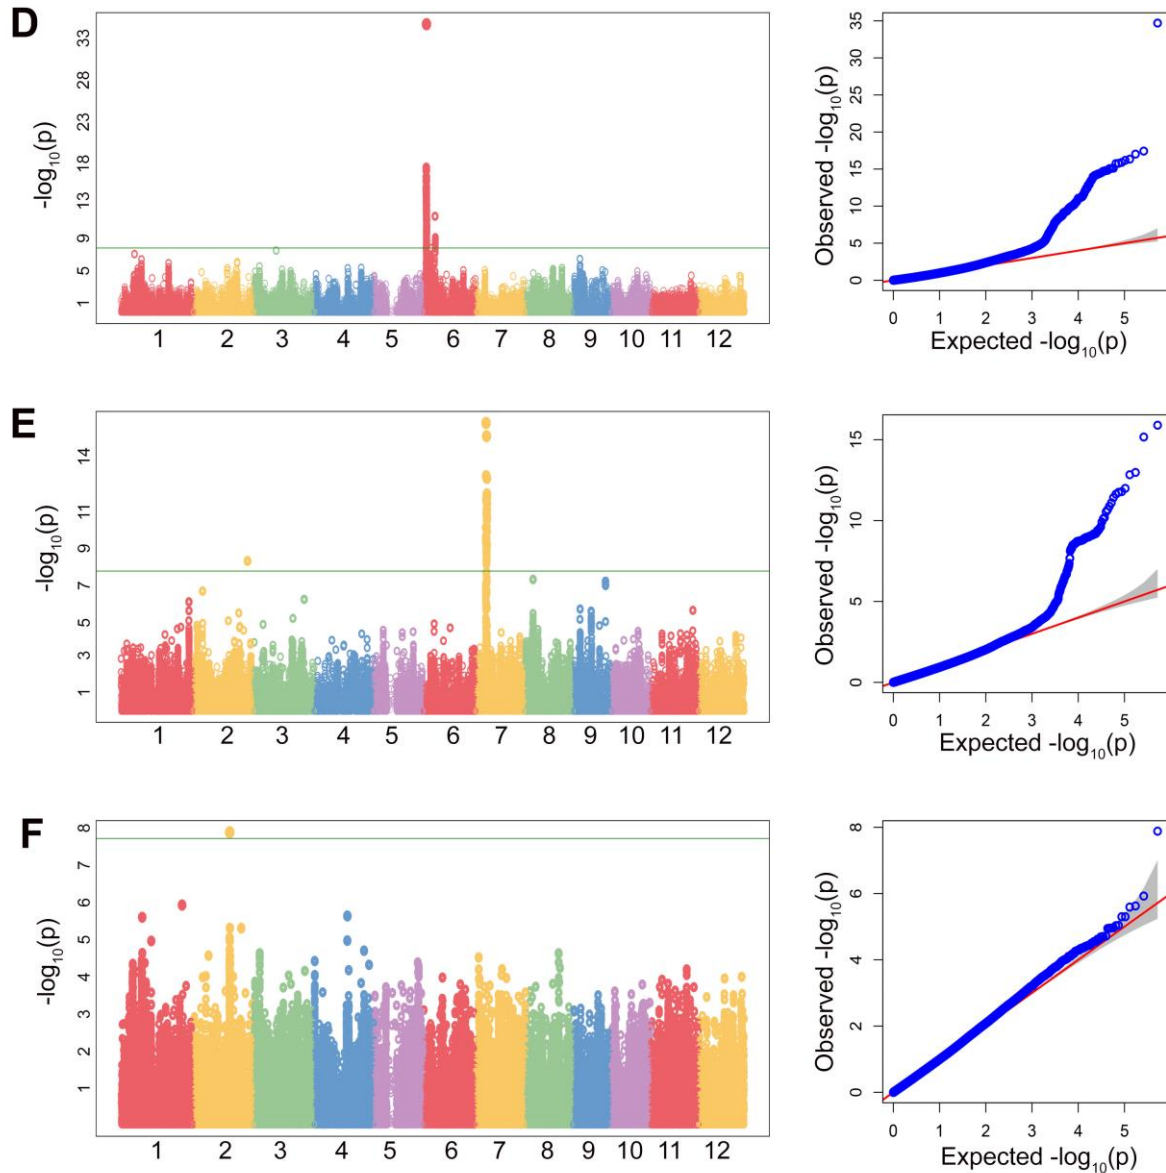

**Supplemental Figure 2: Genome-wide mapping of SNPs associated with different yield-related traits among accessions within original collection.** Manhattan (left) and QQ (right) plots of compressed MLM for (A) Grain length. (B) Grain width. (C) Hundred grain weight. (D) Endosperm type. (E) Seed coat color. (F) Panicle threshability. Negative  $\log_{10}$ -transformed  $P$  values from the compressed mixed linear model are plotted against position of SNPs (x axis) on different chromosomes. Green line in each figure represents the genome-wide cut-off for significant association. Red and blue line in QQ plot represent trajectory for null hypothesis and observed values, respectively.

**Supplemental Table 1:** Range of quantitative traits in original collection and different core collections.

| Traits                            | Original collection (3004 acc) |      | CC1 (231acc) |      | CC2 (300 acc) |      | Merged CC1 & CC2 (503 acc) |      | CC3 (503 + 17 = 520 acc) |      |
|-----------------------------------|--------------------------------|------|--------------|------|---------------|------|----------------------------|------|--------------------------|------|
|                                   | Max                            | Min  | Max          | Min  | Max           | Min  | Max                        | Min  | Max                      | Min  |
| Days to 80% flowering             | 184                            | 50   | 175          | 50   | 175           | 52   | 175                        | 50   | 184                      | 50   |
| 100 GW (gm)                       | 5                              | 0.98 | 4.6          | 0.98 | 4.6           | 0.98 | 4.6                        | 0.98 | 5                        | 0.98 |
| Days to 1 <sup>st</sup> flowering | 182                            | 45   | 171          | 46   | 171           | 45   | 171                        | 45   | 182                      | 45   |
| Grain length (mm)                 | 12.7                           | 4.4  | 12.7         | 4.4  | 12.4          | 4.4  | 12.7                       | 4.4  | 12.7                     | 4.4  |
| Grain width (mm)                  | 4.4                            | 1.5  | 4.1          | 1.7  | 4.3           | 2.1  | 4.4                        | 1.7  | 4.4                      | 1.5  |
| Panicle length (cm)               | 37                             | 13   | 36           | 13   | 36            | 13   | 36                         | 13   | 37                       | 13   |
| Seed coat color                   | 99                             | 10   | 88           | 10   | 99            | 10   | 99                         | 10   | 99                       | 10   |
| Seedling height (cm)              | 74                             | 12   | 71           | 16   | 74            | 13   | 74                         | 13   | 74                       | 12   |
| Culm length (cm)                  | 204                            | 27   | 204          | 35   | 181           | 27   | 204                        | 27   | 204                      | 27   |
| Culm number                       | 40                             | 5    | 40           | 6    | 33            | 5    | 40                         | 5    | 40                       | 5    |
| Culm diameter (mm)                | 9.1                            | 2    | 9.1          | 2    | 7.7           | 3    | 9.1                        | 2    | 9.1                      | 2    |

Highlighted traits were not picked up for their complete range in any mini-core collection (CC1, CC2 and CC3). Seventeen accessions were included in CC3 (503+17 = 520 accessions) to cover the entire range for all the traits with respect to original collection.

**Supplemental Table 2:** Assessment of mini-core collections for various evaluation indices using phenotypic data.

| Core collection | MD%  | VD%   | VR%    | CR%  | H    | I    |
|-----------------|------|-------|--------|------|------|------|
| CC1 (231 acc)   | 4.08 | 39.77 | 86     | 92   | 2.25 | 0.79 |
| CC2 (300 acc)   | 2.8  | 19.78 | 107.68 | 91.1 | 1.98 | 0.77 |
| CC3 (520 acc)   | 2.9  | 18.9  | 109.3  | 96.2 | 2.17 | 0.79 |

MD% (Mean difference percentage), VD% variance difference percentage, VR % (Variable rate of coefficient of variance), CR% (coincidence rate of range), H (Shannon diversity index), I (Nei's diversity index)

**Supplemental Table 3:** Distribution of accessions from different varietal groups in different mini-core collections to check representation from original collection.

| <b>Core/varietal group</b>     | <i>indica</i>         | <b>Tropical japonica</b> | <b>Temperate japonica</b> | <i>japonica</i>      | <i>aus/boro</i>      | <b>Intermediate</b>  | <b>Aromatic (Basmati)</b> |
|--------------------------------|-----------------------|--------------------------|---------------------------|----------------------|----------------------|----------------------|---------------------------|
| Original collection (3004 acc) | <b>1743</b>           | <b>388</b>               | <b>320</b>                | <b>132</b>           | <b>215</b>           | <b>135</b>           | <b>71</b>                 |
| CC1 (231 acc)                  | <b>129</b><br>(7.4%)  | <b>15</b><br>(3.8%)      | <b>38</b><br>(11.9%)      | <b>14</b><br>(10.6%) | <b>11</b><br>(5.1%)  | <b>19</b><br>(14%)   | <b>5</b><br>(7%)          |
| CC2 (300 acc)                  | <b>171</b><br>(9.8%)  | <b>10</b><br>(2.5%)      | <b>8</b><br>(2.5%)        | <b>12</b><br>(9.1%)  | <b>42</b><br>(19.5%) | <b>45</b><br>(33.3%) | <b>12</b><br>(16.9%)      |
| CC3 (520 acc)                  | <b>295</b><br>(16.9%) | <b>27</b><br>(6.9%)      | <b>44</b><br>(13.4%)      | <b>23</b><br>(17.4%) | <b>55</b><br>(25.6%) | <b>61</b><br>(44.4%) | <b>15</b><br>(21%)        |

**Supplemental Table 4:** Distribution of accessions from different regional gene pools in different mini-core collections to check representation from original collection.

| <b>Core/Regions</b>            | <b>South-Asia</b>     | <b>South East-Asia</b> | <b>China</b>           | <b>Africa</b>       | <b>America</b>       | <b>Europe</b>        | <b>East Asia</b>     | <b>Oceania</b>      | <b>Unknown</b>      |
|--------------------------------|-----------------------|------------------------|------------------------|---------------------|----------------------|----------------------|----------------------|---------------------|---------------------|
| Original collection (3004 acc) | <b>787</b>            | <b>1016</b>            | <b>482</b>             | <b>252</b>          | <b>166</b>           | <b>118</b>           | <b>132</b>           | <b>17</b>           | <b>34</b>           |
| CC1 (231 acc)                  | <b>55</b><br>(6.9%)   | <b>52</b><br>(5.1%)    | <b>52</b><br>(10.8%)   | <b>15</b><br>(5.9%) | <b>17</b><br>(10.2%) | <b>18</b><br>(15.2%) | <b>15</b><br>(11.4%) | <b>4</b><br>(23.5%) | <b>3</b><br>(8.8%)  |
| CC2 (300 acc)                  | <b>122</b><br>(15.5%) | <b>70</b><br>(6.9%)    | <b>55</b><br>(11.4%)   | <b>23</b><br>(9.1%) | <b>13</b><br>(7.8%)  | <b>2</b> (1%)        | <b>8</b> (6%)        | <b>1</b> (5.9%)     | <b>6</b><br>(17.4%) |
| CC3 (520 acc)                  | <b>176</b><br>(22.4%) | <b>123</b><br>(12%)    | <b>101</b><br>(20.95%) | <b>38</b><br>(15%)  | <b>28</b><br>(16.9%) | <b>19</b><br>(16.1%) | <b>21</b><br>(15.9%) | <b>5</b><br>(29.4%) | <b>9</b><br>(25.5%) |

**Supplemental Table 5:** Distribution of 3004 accessions of original rice collection in different clusters of maximum likelihood dendrogram (based on different varietal group).

| Cluster/varietal group                  | <i>indica</i> | <i>japonica</i> | Tropical <i>japonica</i> | Temperate <i>japonica</i> | <i>aus/boro</i> | Intermediate | Aromatic (Basmati) |
|-----------------------------------------|---------------|-----------------|--------------------------|---------------------------|-----------------|--------------|--------------------|
| <b>Cluster Ia (1771 acc)</b>            | 1641 (92.6%)  | 7               | 27                       | 30                        | 30              | 26           | 10                 |
| <b>Cluster Ib (216 acc)</b>             | 25            | 1               | 2                        | 7                         | 172 (72.6%)     | 5            | 4                  |
| <b>Cluster IIa (519 acc)</b>            | 35            | 80 (15.4%)      | 329 (63.3%)              | 31                        | 4               | 35           | 5                  |
| <b>Cluster IIb (358 acc)</b>            | 18            | 36              | 22                       | 250 (69.8%)               | 6               | 25           | 1                  |
| <b>Cluster IIc (97 acc)</b>             | 9             | 5               | 6                        | 1                         | 3               | 23 (23.7%)   | 50 (51.5%)         |
| <b>Un-clustered accessions (43 acc)</b> | 15 (34.8%)    | 3               | 2                        | 1                         | 0               | 21 (48.8%)   | 1                  |

**Supplemental Table 6:** Distribution of CC3 accessions (520) in different clusters of maximum-likelihood dendrogram of original collection of rice (3004 accessions).

| Accession distribution in cluster of maximum-likelihood dendrogram of original collection (3004 accessions) | Distribution of accession from different clusters of maximum-likelihood dendrogram captured in CC3 (520 accessions) |
|-------------------------------------------------------------------------------------------------------------|---------------------------------------------------------------------------------------------------------------------|
| Cluster Ia - 1771 accessions                                                                                | Cluster Ia - 322 accessions (18.1%)                                                                                 |
| Cluster Ib - 216 accessions                                                                                 | Cluster Ib - 42 accessions (19.4%)                                                                                  |
| Cluster IIa - 519 accessions                                                                                | Cluster IIa - 55 accessions (10.5%)                                                                                 |
| Cluster IIb - 358 accessions                                                                                | Cluster IIb - 65 accessions (18%)                                                                                   |
| Cluster IIc - 97 accessions                                                                                 | Cluster IIc - 25 accessions (25.7%)                                                                                 |
| Un-clustered group - 43 accessions                                                                          | Un-clustered group - 11 accessions (25%)                                                                            |



**Supplemental Table 7:** Distribution of different varietal group of original collection (3004 accessions) in different clusters of FastSTRUCTURE analysis.

| <b>Varietal group/<br/>Cluster</b>        | <b>FSTR CL1<br/>(219 acc)</b> | <b>FSTR CL2<br/>(522 acc)</b> | <b>FSTR CL3<br/>(90 acc)</b> | <b>FSTR CL4<br/>(973 acc)</b> | <b>FSTR CL5<br/>(372 acc)</b> | <b>FSTR CL6<br/>(323 acc)</b> | <b>FSTR CL7<br/>(505 acc)</b> |
|-------------------------------------------|-------------------------------|-------------------------------|------------------------------|-------------------------------|-------------------------------|-------------------------------|-------------------------------|
| <i>indica</i><br>(1743 acc)               | 28                            | 47                            | 9                            | <b>885 (91%)</b>              | 26                            | <b>297 (92%)</b>              | <b>451<br/>(89.3%)</b>        |
| <i>japonica</i><br>(132 acc)              | 1                             | <b>94 (18%)</b>               | 4                            | 5                             | 25                            | 0                             | 3                             |
| Temperate<br><i>japonica</i><br>(320 acc) | 4                             | 35                            | 1                            | 17                            | <b>248<br/>(66.6%)</b>        | 6                             | 9                             |
| Tropical<br><i>japonica</i><br>(388 acc)  | 1                             | <b>310<br/>(59.3%)</b>        | 2                            | 26                            | 35                            | 5                             | 9                             |
| <i>aus/boro</i><br>(215 acc)              | <b>179<br/>(81.7%)</b>        | 3                             | 5                            | 14                            | 5                             | 4                             | 5                             |
| Intermediate<br>(135 acc)                 | 3                             | <b>27</b>                     | <b>19 (21.1%)</b>            | <b>21</b>                     | <b>29</b>                     | 9                             | <b>27</b>                     |
| Aromatic<br>(Basmati)<br>(71 acc)         | 3                             | 6                             | <b>50 (55.5%)</b>            | 5                             | 4                             | 2                             | 1                             |

**Supplemental Table 8:** Analysis of original collection (3004 accessions) for admixtures through population structure using FastSTRUCTURE.

| Pure accessions (1762 acc) |     | Admixtures (1242 acc)     |     |
|----------------------------|-----|---------------------------|-----|
| Structure analysis (K=7)   |     | Structure analysis (K=7)  |     |
| FSTR CL 1                  | 189 | FSTR CL 1                 | 30  |
| FSTR CL 2                  | 330 | FSTR CL 2                 | 192 |
| FSTR CL 3                  | 64  | FSTR CL 3                 | 26  |
| FSTR CL 4                  | 591 | FSTR CL 4                 | 382 |
| FSTR CL 5                  | 256 | FSTR CL 5                 | 116 |
| FSTR CL 6                  | 148 | FSTR CL 6                 | 145 |
| FSTR CL 7                  | 154 | FSTR CL 7                 | 351 |
| Varietal group (K=7)       |     | Varietal group (K=7)      |     |
| <i>indica</i>              | 922 | <i>indica</i>             | 821 |
| <i>japonica</i>            | 90  | <i>japonica</i>           | 42  |
| Temperate <i>japonica</i>  | 234 | Temperate <i>japonica</i> | 86  |
| Tropical <i>japonica</i>   | 236 | Tropical <i>japonica</i>  | 152 |
| <i>aus/ boro</i>           | 186 | <i>aus/ boro</i>          | 29  |
| Aromatic (Basmati)         | 53  | Aromatic (Basmati)        | 18  |
| Intermediate               | 41  | Intermediate              | 94  |
| Region wise (K=7)          |     | Region wise (K=7)         |     |
| South Asia                 | 497 | South Asia                | 290 |
| South East Asia            | 567 | South East Asia           | 449 |
| China                      | 275 | China                     | 207 |
| Africa                     | 166 | Africa                    | 86  |
| America                    | 87  | America                   | 79  |
| Europe                     | 53  | Europe                    | 65  |
| East Asia                  | 89  | East Asia                 | 43  |
| Oceania                    | 9   | Oceania                   | 8   |
| Unknown                    | 19  | Unknown                   | 15  |

Accessions with  $\geq 80\%$  genome similarity were considered as pure while accessions with  $< 80\%$  shared genome were termed as admixtures. Accessions highlighted in red have around equal or more number of admixtures than pure accessions.

**Supplemental Table 9:** Distribution of CC3 accessions (520 accessions) in FastSTRUCTURE derived clusters of original collection of (3004 rice accessions).

| FastStructure Clusters | Accessions from original collection | Accessions of original collection with Q value > 80% (Pure) | Accessions of original collection with Q value < 80% (Admixtures) | Accessions picked from original collection in CC3 mini-core | Accessions of CC3 with Q value > 80% (Pure) | Accessions of CC3 with Q value < 80% (Admixture) |
|------------------------|-------------------------------------|-------------------------------------------------------------|-------------------------------------------------------------------|-------------------------------------------------------------|---------------------------------------------|--------------------------------------------------|
| FSTR CL 1              | 219                                 | 189                                                         | 30                                                                | 50                                                          | 40                                          | 10                                               |
| FSTR CL 2              | 522                                 | 330                                                         | 192                                                               | 42                                                          | 23                                          | 19                                               |
| FSTR CL 3              | 90                                  | 64                                                          | 26                                                                | 24                                                          | 13                                          | 11                                               |
| FSTR CL 4              | 973                                 | 591                                                         | 382                                                               | 185                                                         | 109                                         | 76                                               |
| FSTR CL 5              | 372                                 | 256                                                         | 116                                                               | 74                                                          | 37                                          | 37                                               |
| FSTR CL 6              | 323                                 | 148                                                         | 145                                                               | 61                                                          | 28                                          | 33                                               |
| FSTR CL 7              | 505                                 | 154                                                         | 351                                                               | 84                                                          | 25                                          | 59                                               |

Accessions with  $\geq 80\%$  genome similarity were considered as pure while accessions with  $< 80\%$  shared genome were termed as admixtures. Accessions highlighted in red have around equal or more number of admixtures than pure accessions.

**Supplemental Table 10:** Assessment of nucleotide diversity of important agronomic genes across original and mini-core panel.

| Gene (+/- 1.5 Kb)   | MSU Id         | Trait regulation              | Mean Pi value (Original collection) | Mean Pi value (mini-core, CC3) |
|---------------------|----------------|-------------------------------|-------------------------------------|--------------------------------|
| <i>GW5</i>          | LOC_Os05g09520 | Grain width                   | 0.30                                | 0.28                           |
| <i>Waxy</i>         | LOC_Os06g04200 | Grain cooking quality         | 0.43                                | 0.43                           |
| <i>Rc</i>           | LOC_Os07g11020 | Grain color                   | 0.44                                | 0.45                           |
| <i>OsSPL13/GLW7</i> | LOC_Os07g32170 | Grain length                  | 0.31                                | 0.30                           |
| <i>OsFIE1</i>       | LOC_Os08g04290 | Grain size                    | 0.24                                | 0.23                           |
| <i>GIF1</i>         | LOC_Os04g33740 | Grain filling                 | 0.41                                | 0.40                           |
| <i>Hd1</i>          | LOC_Os06g19444 | Flowering time                | 0.40                                | 0.40                           |
| <i>Ehd1</i>         | LOC_Os10g32600 | Flowering time                | 0.33                                | 0.34                           |
| <i>Ghd7</i>         | LOC_Os07g15770 | Flowering time & Grain number | 0.44                                | 0.42                           |
| <i>RFT1</i>         | LOC_Os06g06300 | Flowering time                | 0.48                                | 0.47                           |
| <i>LAX1</i>         | LOC_Os01g61480 | Panicle development           | 0.45                                | 0.42                           |
| <i>SPI</i>          | LOC_Os11g12740 | Panicle development           | 0.27                                | 0.27                           |

**Supplemental Table 11:** Distribution of CC3 accessions (520 accessions) based on varietal groups in different clusters of FastSTRUCTURE analysis (K=7). Numbers in parentheses represents accessions.

| <b>Cluster/<br/>Varietal<br/>group</b> | <i>indica</i><br>(295) | <b>Tropical<br/><i>japonica</i></b><br>(27) | <b>Temperate<br/><i>japonica</i></b><br>(44) | <i>Japonica</i><br>(23) | <i>aus/boro</i><br>(55) | <b>Intermediate</b><br>(61) | <b>Aromatic<br/>(Basmati)</b><br>(15) |
|----------------------------------------|------------------------|---------------------------------------------|----------------------------------------------|-------------------------|-------------------------|-----------------------------|---------------------------------------|
| CC CL1<br>(73 acc)                     | 57                     | 0                                           | 1                                            | 1                       | 1                       | 12                          | 1                                     |
| CC CL2<br>(23 acc)                     | 1                      | 0                                           | 0                                            | 0                       | 5                       | 8                           | 9                                     |
| CC CL3<br>(49 acc)                     | 6                      | 0                                           | 1                                            | 1                       | 41                      | 0                           | 0                                     |
| CC CL4<br>(70 acc)                     | 58                     | 1                                           | 0                                            | 0                       | 3                       | 8                           | 0                                     |
| CC CL5<br>(43 acc)                     | 3                      | 17                                          | 4                                            | 10                      | 0                       | 8                           | 1                                     |
| CC CL6<br>(191 acc)                    | 165                    | 5                                           | 2                                            | 2                       | 4                       | 11                          | 2                                     |
| CC CL7<br>(71 acc)                     | 5                      | 4                                           | 36                                           | 9                       | 1                       | 14                          | 2                                     |

**Supplemental Table 12:** Analysis of CC3 (520 accessions) for admixtures through population structure using FastSTRUCTURE.

| Pure accessions (275 accessions) |     | Admixtures (245 accessions) |     |
|----------------------------------|-----|-----------------------------|-----|
| Structure analysis (K=7)         |     | Structure analysis (K=7)    |     |
| CC CL1                           | 25  | CC CL1                      | 48  |
| CC CL2                           | 13  | CC CL2                      | 10  |
| CC CL3                           | 40  | CC CL3                      | 9   |
| CC CL4                           | 28  | CC CL4                      | 42  |
| CC CL5                           | 23  | CC CL5                      | 20  |
| CC CL6                           | 109 | CC CL6                      | 82  |
| CC CL7                           | 37  | CC CL7                      | 34  |
| Varietal group (K=7)             |     | Varietal group (K=7)        |     |
| <i>indica</i>                    | 151 | <i>indica</i>               | 144 |
| <i>japonica</i>                  | 11  | <i>japonica</i>             | 12  |
| Temperate <i>japonica</i>        | 29  | Temperate <i>japonica</i>   | 15  |
| Tropical <i>japonica</i>         | 14  | Tropical <i>japonica</i>    | 13  |
| <i>aus/ boro</i>                 | 45  | <i>aus/ boro</i>            | 10  |
| Aromatic (Basmati)               | 11  | Aromatic (Basmati)          | 4   |
| Intermediate                     | 14  | Intermediate                | 47  |
| Region wise (K=7)                |     | Region wise (K=7)           |     |
| South Asia                       | 106 | South Asia                  | 70  |
| South East Asia                  | 60  | South East Asia             | 63  |
| China                            | 47  | China                       | 54  |
| Africa                           | 23  | Africa                      | 15  |
| America                          | 15  | America                     | 23  |
| Europe                           | 6   | Europe                      | 13  |
| East Asia                        | 11  | East Asia                   | 10  |
| Oceania                          | 2   | Oceania                     | 3   |
| Unknown                          | 5   | Unknown                     | 4   |

Accessions with  $\geq 80\%$  genome similarity were considered as pure while accessions with  $< 80\%$  shared genome were termed as admixtures. Accessions highlighted in red have equal or more number of admixtures than pure accessions.

**Supplemental Table 13:** Association analysis using 520 accessions of mini-core (CC3) for salt Injury (EC18) trait.

| Chr | Position | Major allele | Minor allele | MAF   | Nipponbare allele | p-value FDR adjusted   | Allele effect | Known QTL (Ref)                                                             |
|-----|----------|--------------|--------------|-------|-------------------|------------------------|---------------|-----------------------------------------------------------------------------|
| 11  | 21158097 | G            | A            | 0.17  | G                 | 1.5 X 10 <sup>-5</sup> | 0.5           | <i>qPD18_11.1</i> & <i>qSES18_11.1</i><br>(Batayeva et al., 2018)           |
| 8   | 9199572  | C            | T            | 0.04  | C                 | 5.3 X 10 <sup>-5</sup> | -0.98         | <i>qCLV-8.1a</i> & <i>qSSISFH-8.1</i><br>(Pandit et al., 2010)              |
| 1   | 18708590 | C            | T            | 0.37  | C                 | 4.4 X 10 <sup>-4</sup> | -0.25         | <i>Saltol</i> or <i>qSNC1</i><br>(Naveed et al., 2018; Rohila et al., 2019) |
| 5   | 21472511 | T            | A            | 0.03  | T                 | 7.2 X 10 <sup>-4</sup> | 0.78          | <i>qSSIGY5.1</i><br>(Tiwari et al., 2016)                                   |
| 6   | 11673230 | C            | A            | 0.02  | C                 | 0.017                  | 0.53          | <i>qSSIGY6.2</i><br>(Tiwari et al., 2016)                                   |
| 12  | 1395155  | A            | G            | 0.02  | A                 | 0.033                  | 0.84          |                                                                             |
| 9   | 16614202 | G            | A            | 0.035 | G                 | 0.04                   | 0.81          |                                                                             |

**Supplemental Table 14:** List of common accessions between mini-core (520) and temperate *japonica* (191) panel.

| S. No | IRIS ID       | S. No | IRIS ID        |
|-------|---------------|-------|----------------|
| 1     | IRIS_313-8099 | 13    | IRIS_313-8387  |
| 2     | IRIS_313-8125 | 14    | IRIS_313-8399  |
| 3     | IRIS_313-8127 | 15    | IRIS_313-8665  |
| 4     | IRIS_313-8137 | 16    | IRIS_313-8690  |
| 5     | IRIS_313-8140 | 17    | IRIS_313-9002  |
| 6     | IRIS_313-8141 | 18    | IRIS_313-9410  |
| 7     | IRIS_313-8145 | 19    | IRIS_313-9463  |
| 8     | IRIS_313-8155 | 20    | IRIS_313-9468  |
| 9     | IRIS_313-8162 | 21    | IRIS_313-9523  |
| 10    | IRIS_313-8168 | 22    | IRIS_313-9769  |
| 11    | IRIS_313-8200 | 23    | IRIS_313-10437 |
| 12    | IRIS_313-8208 | 24    | IRIS_313-11153 |

**Supplemental Table 15:** List of SNPs showing significant association with different traits in 3004 rice accessions of original collection.

| Trait                 | Chr | Position | Major allele | Minor allele | Minor allele frequency | Nipp. allele | P-value FDR adjusted     | R <sup>2</sup> value (%) | Known loci  |
|-----------------------|-----|----------|--------------|--------------|------------------------|--------------|--------------------------|--------------------------|-------------|
| Grain length          | 3   | 16733441 | G            | T            | 0.36                   | G            | 3.4 X 10 <sup>-43</sup>  | 43.5                     | <i>GS3</i>  |
| Grain length          | 5   | 5361894  | G            | A            | 0.36                   | G            | 3.4 X 10 <sup>-9</sup>   | 38.8                     | <i>qSW5</i> |
| Grain width           | 5   | 5371686  | C            | T            | 0.49                   | C            | 9.3 X 10 <sup>-34</sup>  | 51.4                     | <i>qSW5</i> |
| Grain width           | 5   | 28019687 | T            | C            | 0.10                   | T            | 8.4 X 10 <sup>-6</sup>   | 48                       |             |
| Hundred Grain weight  | 3   | 16733441 | G            | T            | 0.36                   | G            | 7.9 X 10 <sup>-5</sup>   | 35.2                     | <i>GS3</i>  |
| Hundred Grain weight  | 5   | 5375201  | T            | C            | 0.48                   | T            | 7.9 X 10 <sup>-5</sup>   | 35.2                     | <i>qSW5</i> |
| Endosperm type        | 6   | 1731808  | G            | C            | 0.20                   | G            | 1.03 X 10 <sup>-29</sup> | 20.2                     | <i>waxy</i> |
| Endosperm type        | 6   | 6830286  | G            | A            | 0.21                   | G            | 3.4 X 10 <sup>-8</sup>   | 15.6                     |             |
| Seed coat color       | 7   | 6133394  | G            | A            | 0.26                   | G            | 6.6 X 10 <sup>-11</sup>  | 7.2                      | <i>Rc</i>   |
| Seed coat color       | 7   | 6417000  | G            | T            | 0.32                   | G            | 1.7 X 10 <sup>-10</sup>  | 7.1                      |             |
| Seed coat color       | 7   | 6656052  | T            | C            | 0.43                   | T            | 1.8 X 10 <sup>-8</sup>   | 6.8                      |             |
| Seed coat color       | 2   | 32431463 | A            | G            | 0.27                   | A            | 3.7 X 10 <sup>-5</sup>   | 5.6                      |             |
| Panicle threshability | 2   | 21739453 | C            | T            | 0.23                   | C            | 6.8 X 10 <sup>-3</sup>   | 16.4                     |             |

Nipp; Nipponbare, Chr; Chromosome
